# Supplementary material for: Raphani Semen (Raphanus sativus L.) Ameliorates Alcoholic Fatty Liver Disease by Regulating De Novo Lipogenesis
Source: MDPI journal article supplement (doi:10.3390/nu13124448), 2021-12-13
Supplement: s1 [file s1]

## Supplementary Information

### **Raphani Semen (*Raphanus sativus* L.) ameliorates alcoholic fatty liver disease by regulating de novo lipogenesis**

*Park et al.*

*Figure S1. Effect of RSWE on p-IkB $\alpha$  and NF- $\kappa$ B in liver of C57BL/6J NIAAA mouse model.*

*Figure S2. Effect of RSWE on ATGL, HSL, and CPT1 $\beta$  in liver of C57BL/6J NIAAA mouse model.*

*Figure S3. Effect of RSWE on ACC in liver of C57BL/6J NIAAA mouse model.*

**Figure S1.**

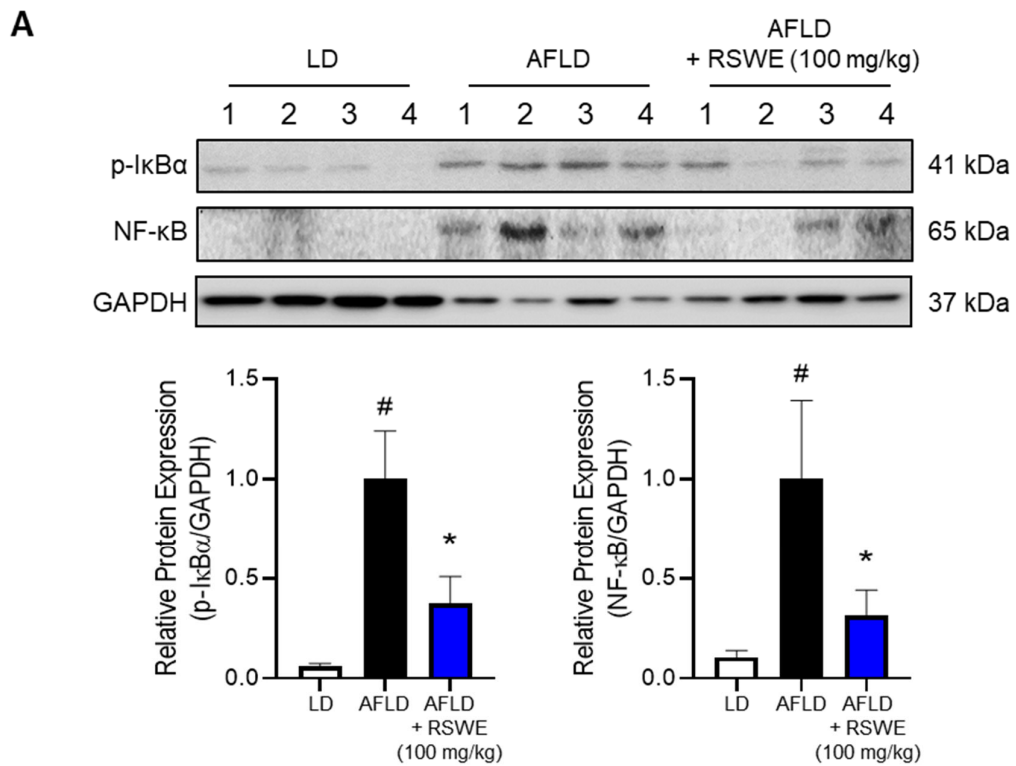

**Figure S1. Effect of RSWE on p-IkBα and NF-κB in liver of C57BL/6J NIAAA mouse model.**

(A) Protein levels of p-IkB, and NF-κB were analyzed using Western blot analysis. GAPDH was used as a loading control. All data are expressed as the mean  $\pm$  S.E.M. of data ( $n = 4$ , per group). # $p < 0.05$  vs. LD group, \* $p < 0.05$  vs. AFLD group. RSWE, Raphani Semen water extract; LD, liquid diet; AFLD, alcoholic fatty liver diseases.

**Figure S2.**

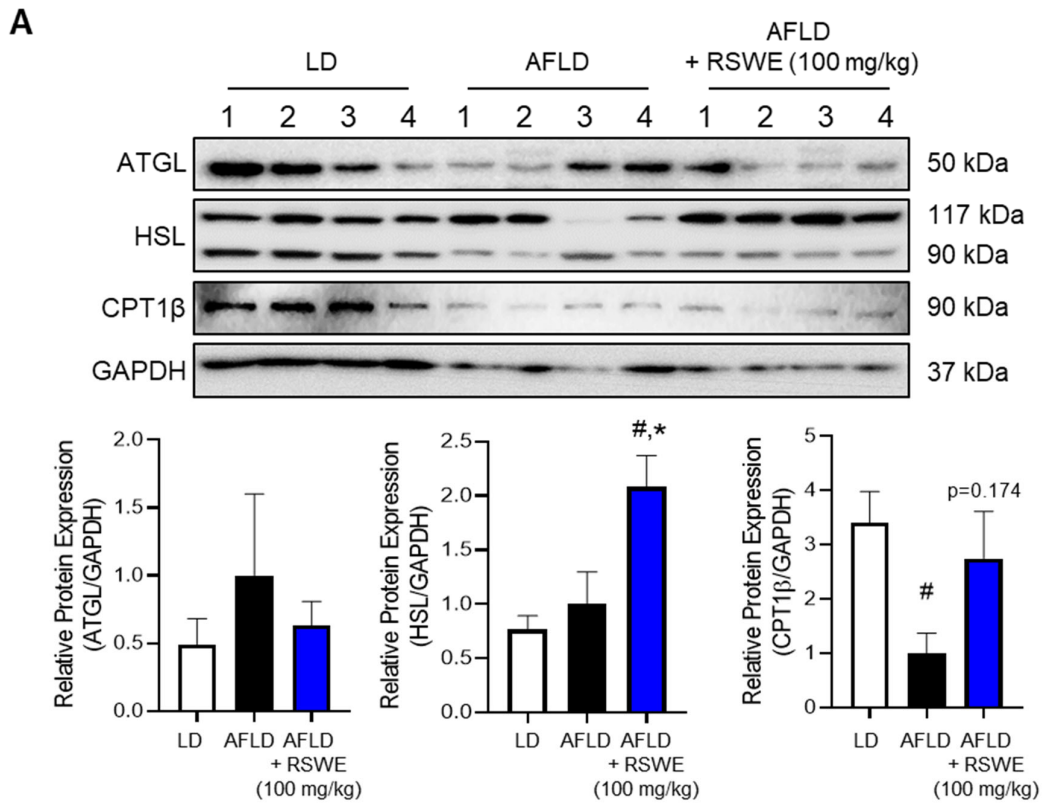

**Figure S2. Effect of RSWE on ATGL, HSL, and CPT1β in liver of C57BL/6J NIAAA mouse model.**

(A) Protein levels of ATGL, HSL, and CPT1β were analyzed using Western blot analysis. GAPDH was used as a loading control. All data are expressed as the mean ± S.E.M. of data ( $n = 4$ , per group). <sup>#</sup> $p < 0.05$  vs. LD group, <sup>\*</sup> $p < 0.05$  vs. AFLD group. RSWE, Raphani Semen water extract; LD, liquid diet; AFLD, alcoholic fatty liver diseases.

**Figure S3.**

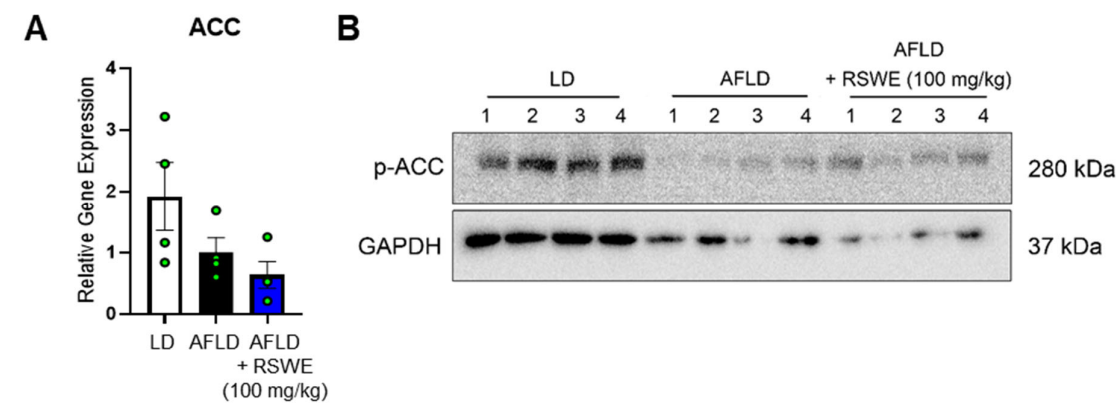

**Figure S3. Effect of RSWE on ACC in liver of C57BL/6J NIAAA mouse model.**

(A) The mRNA expression of ACC in the liver was analyzed using qPCR. (B) Protein levels of p-ACC was analyzed using Western blot analysis. GAPDH was used as a loading control. All data are expressed as the mean  $\pm$  S.E.M. of data ( $n = 4$ , per group). RSWE, RSWE, Raphani Semen water extract; LD, liquid diet; AFLD, alcoholic fatty liver diseases.
